# Supplementary material for: Neuronal Growth Cone Size-Dependent and -Independent Parameters of Microtubule Polymerization
Source: PubMed Central journal article supplement (PMC6056669; doi:10.3389/fncel.2018.00195), 2018-07-17

## Supplementary Material Images

# Neuronal growth cone size-dependent and -independent parameters of microtubule polymerization

Alexa Kiss, Irmgard Fischer, Tatjana Kleele, Thomas Misgeld, and Friedrich Propst\*

\* **Correspondence:** Corresponding Author: [friedrich.propst@univie.ac.at](mailto:friedrich.propst@univie.ac.at)

Figure S1

A

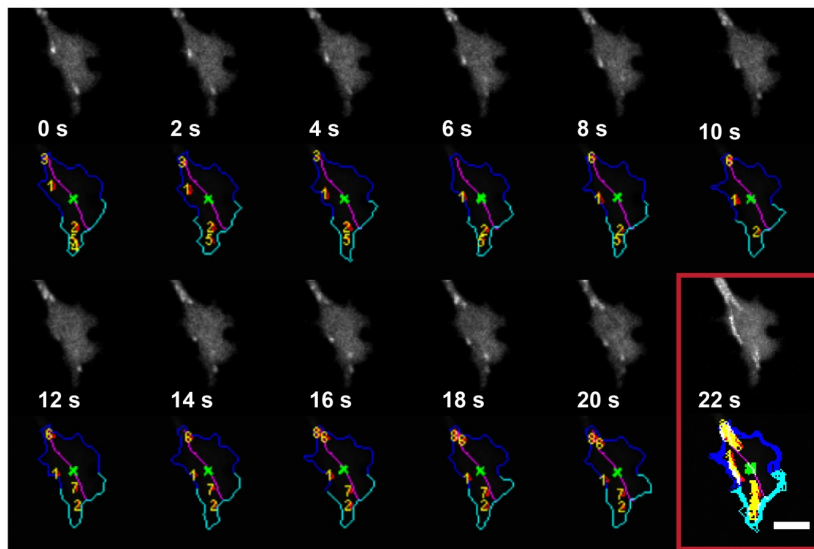

B

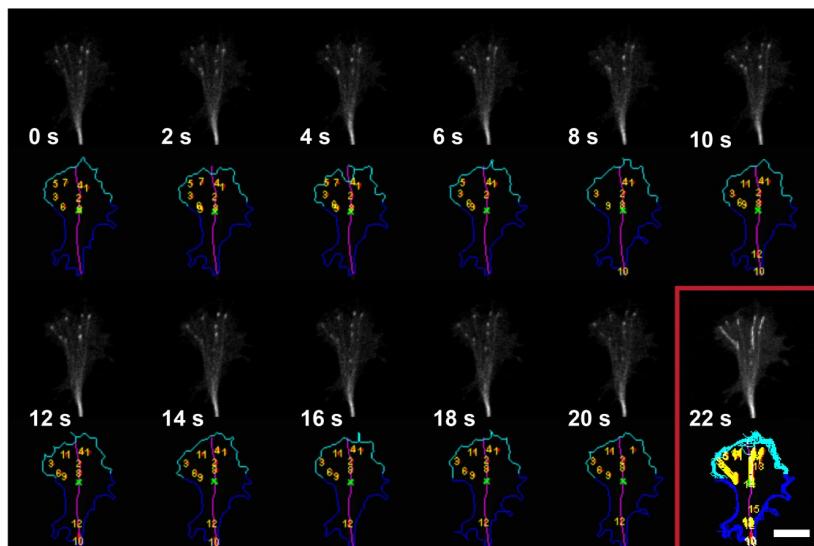

Figure S2

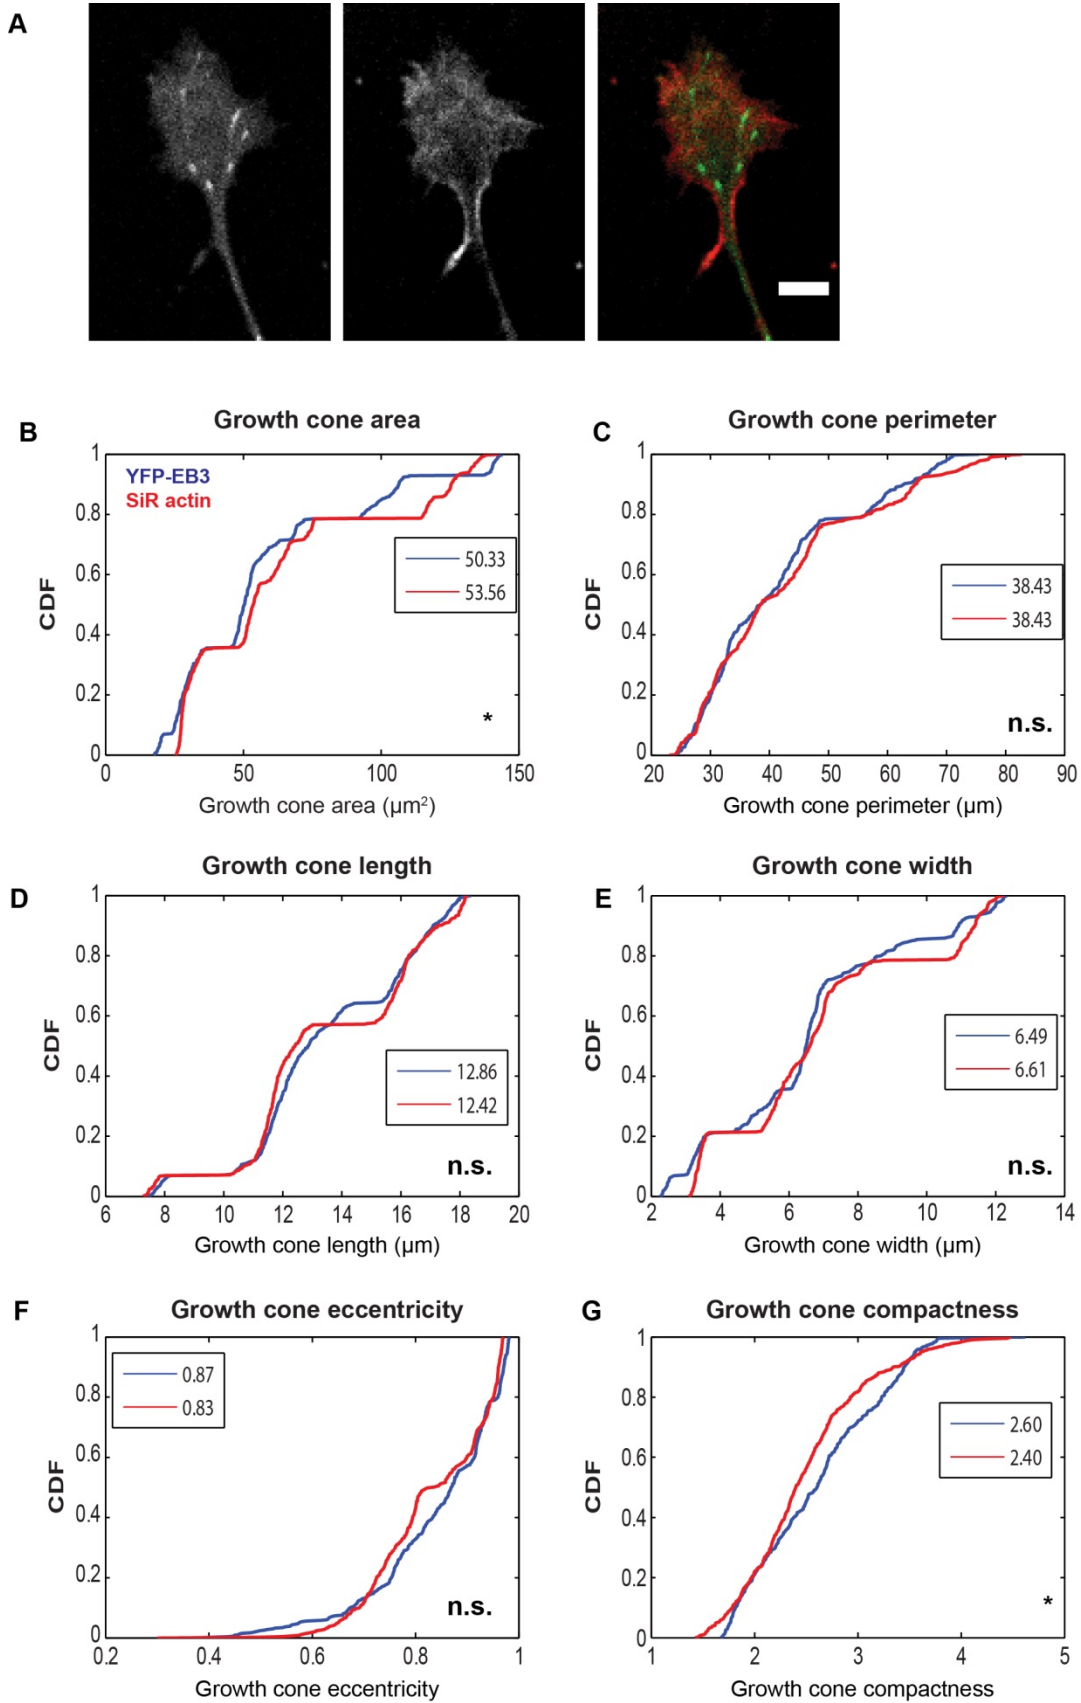

Figure S3

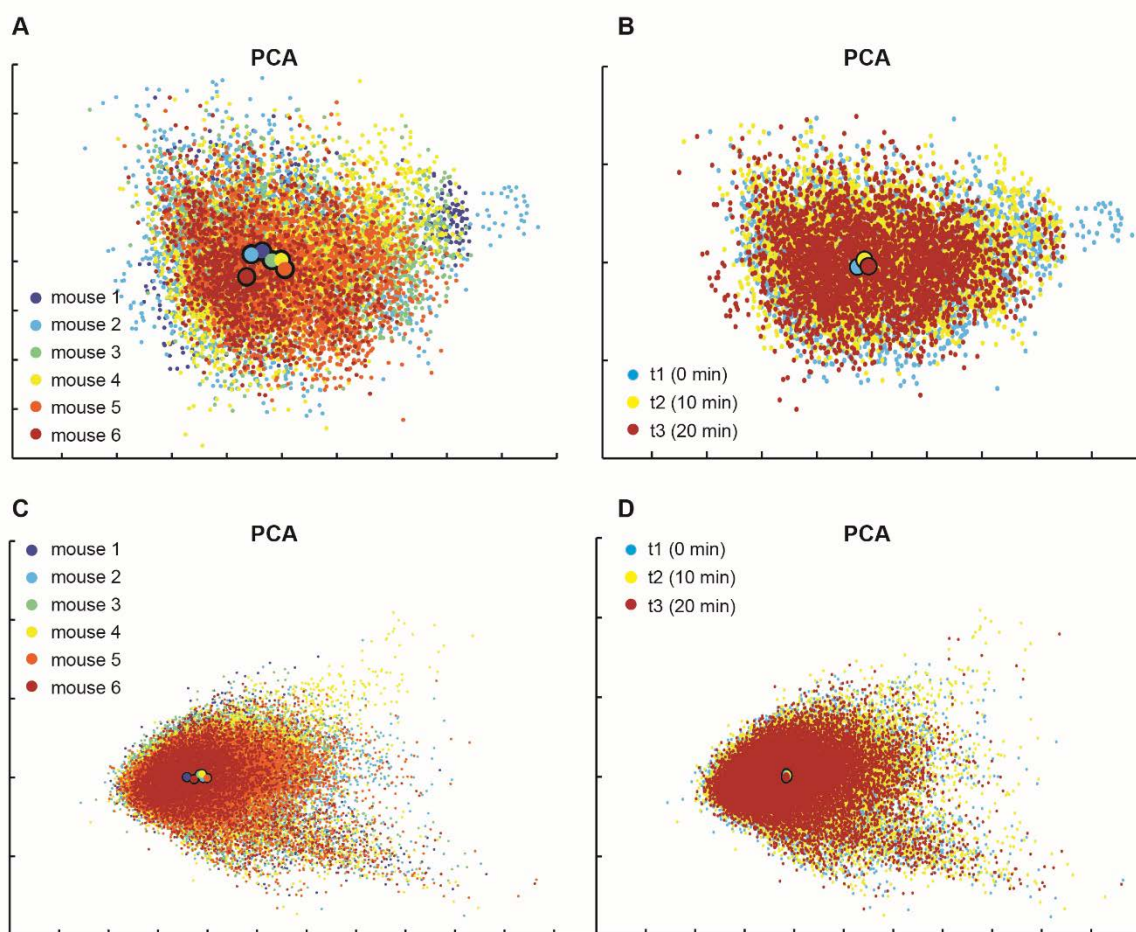

Figure S4

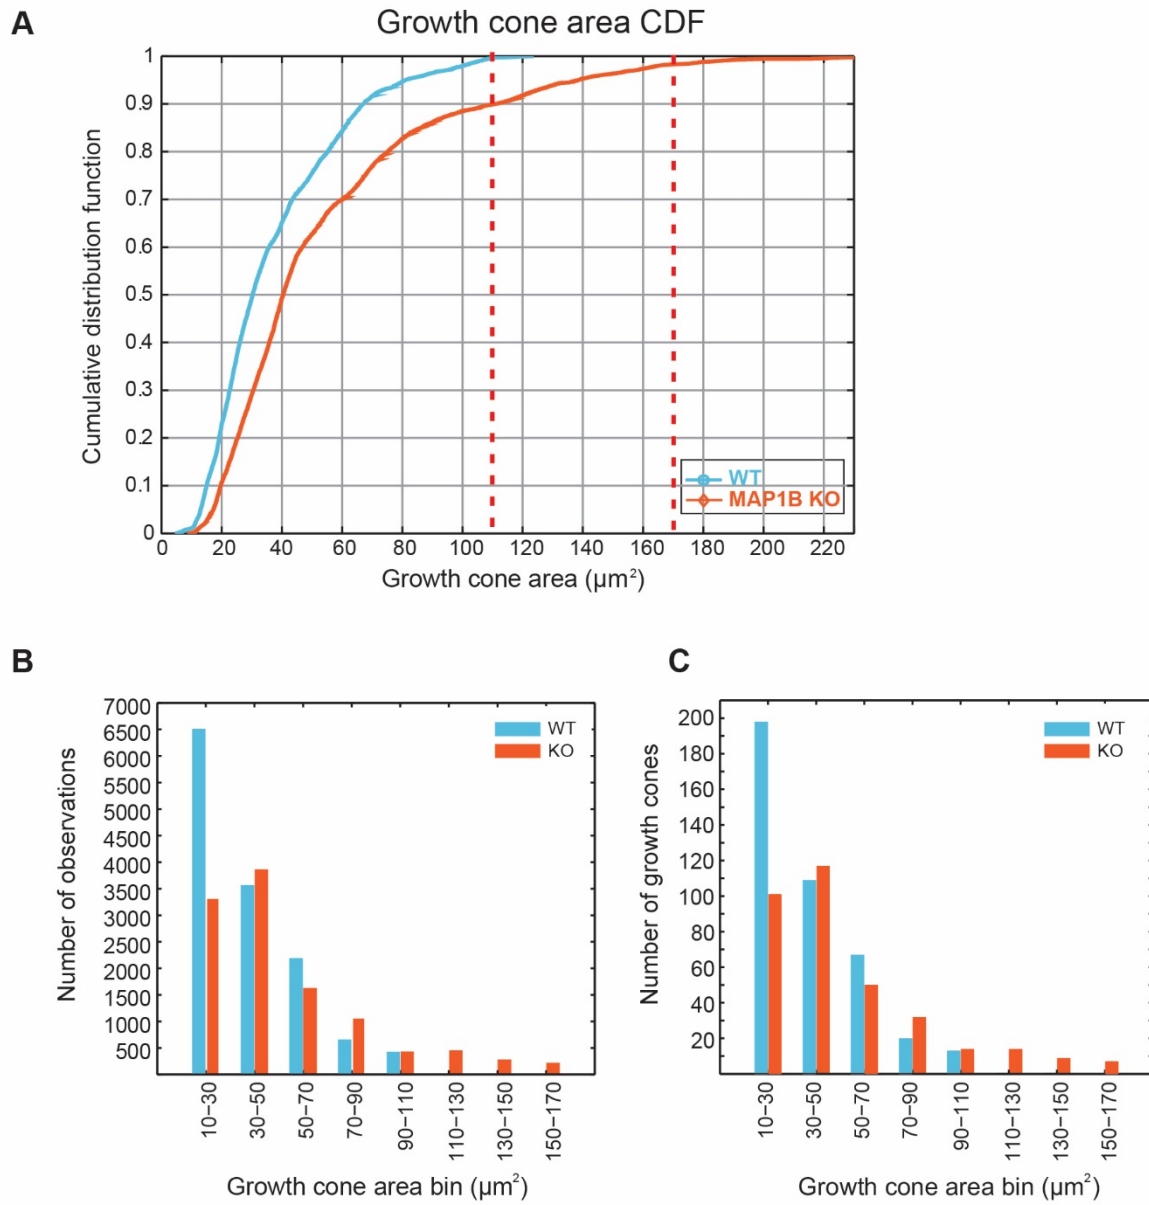

**Figure S5**

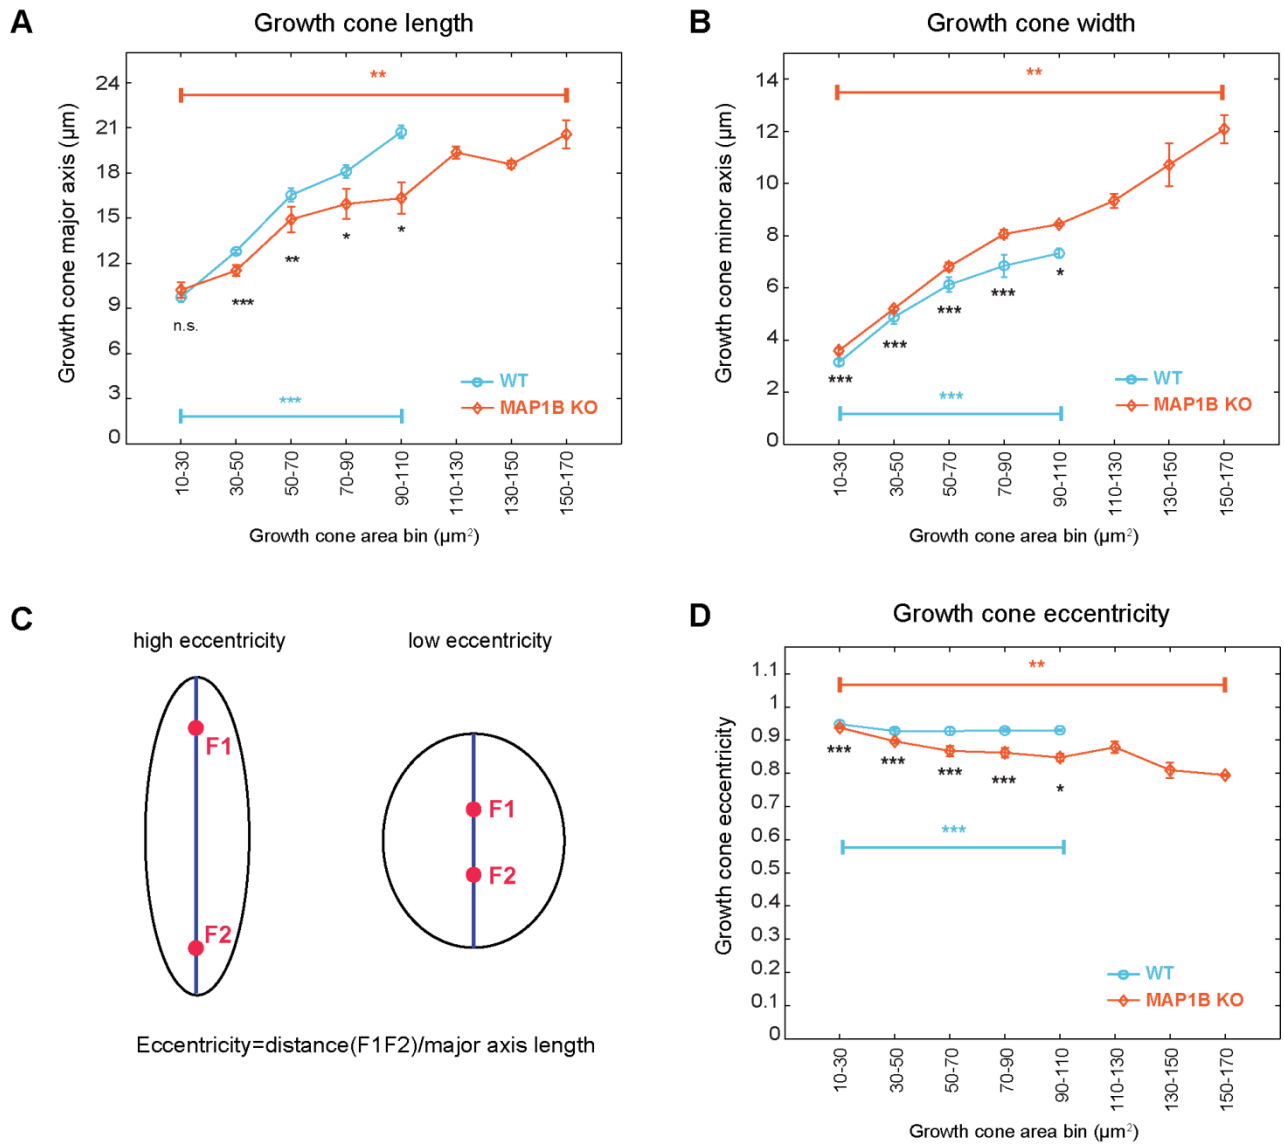

Figure S6

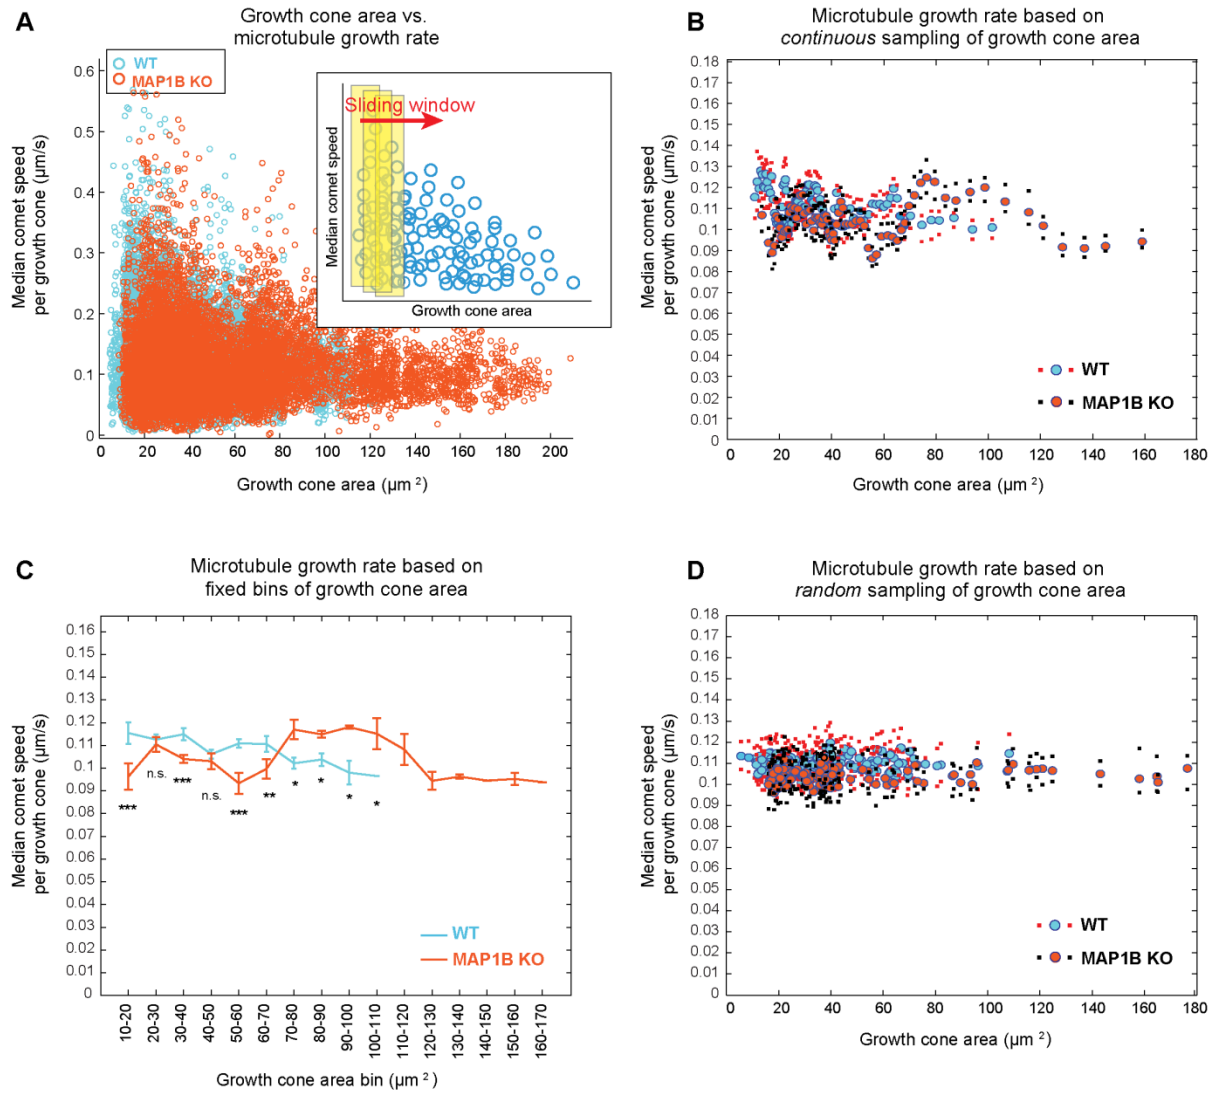

**Figure S7**

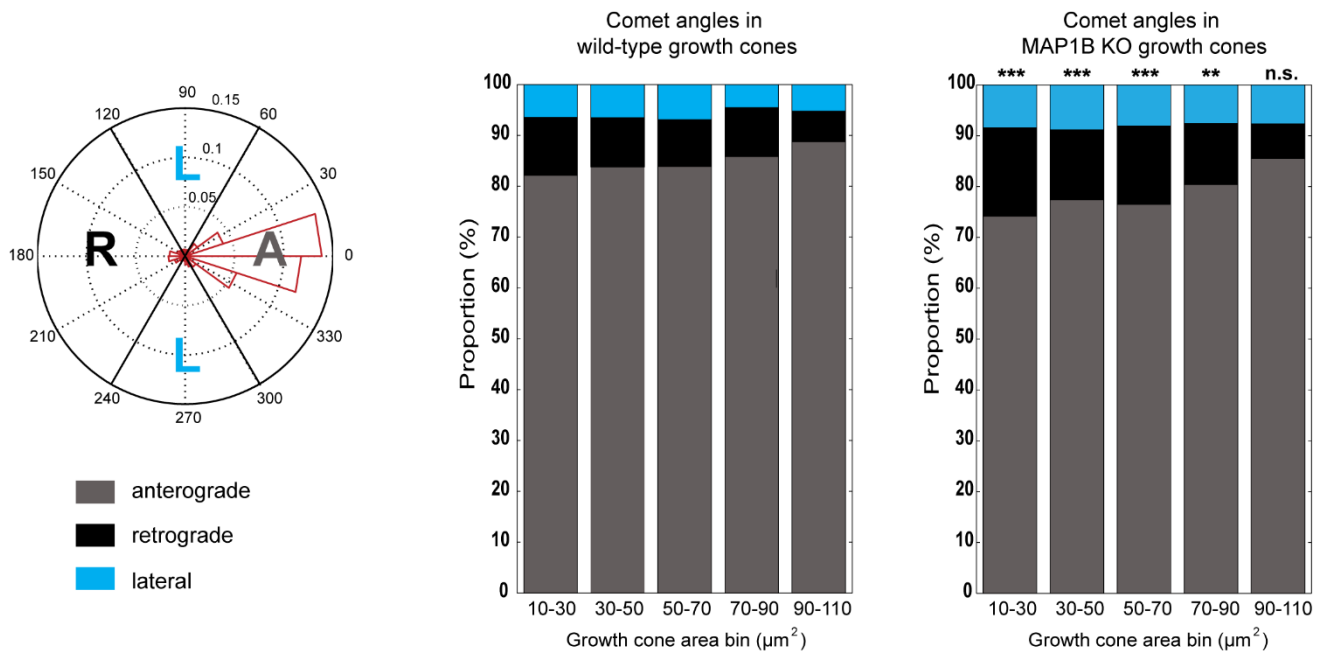

Figure S8

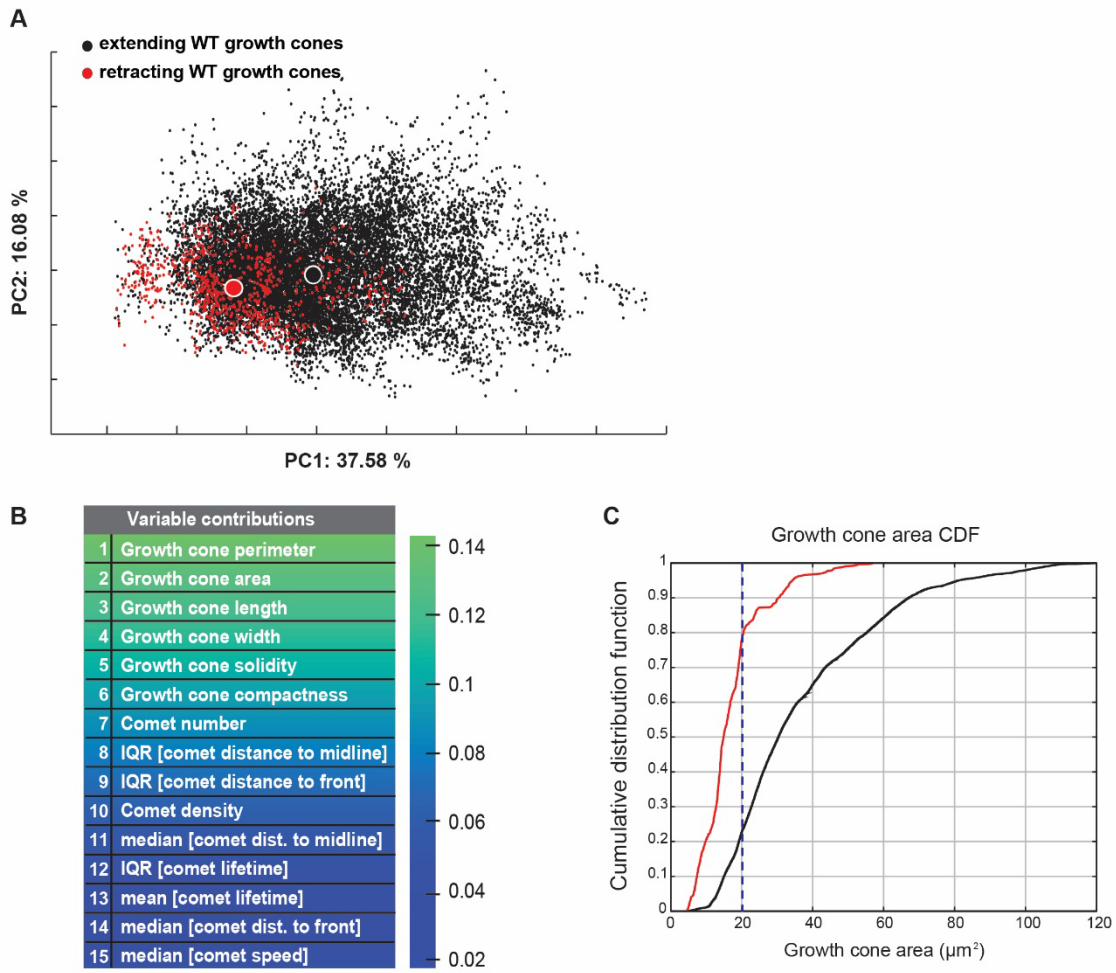

Supplement: Image_1.pdf [file Image_1.pdf]
