# Supplementary material for: Neuronal Growth Cone Size-Dependent and -Independent Parameters of Microtubule Polymerization
Source: Front Cell Neurosci. 2018 Jul 17;12:195. doi: 10.3389/fncel.2018.00195 (PMC6056669; doi:10.3389/fncel.2018.00195)
Supplement: Table S1 — Definition of variables. This table describes the quantitative properties measured in this study on diverse spatial scales: growth cone-level (Sheet 1) and YFP-EB3 comet-level (Sheet 2). Corresponding units, detailed descriptions and calculation methods are also included. [file Table_1.XLSX]

## Sheet: Growth cone level
Table S1
Variable name	Unit	Description
Growth cone area	µm2	Segmented growth cone area
Growth cone major axis	µm	Longest axis of the growth cone
Growth cone minor axis	µm	Shortest axis of the growth cone perpendicular to the major axis
Growth cone eccentricity	dimensionless (0-1)	Ratio of the distance between fitted ellipse focal points/growth cone major axis length
Growth cone perimeter	µm	Perimeter of the segmented growth cone
Growth cone solidity	dimensionless (>=1)	Ratio of convex growth cone area/growth cone area. Higher values indicate roundness
Growth cone roundness	dimensionless	4*Area/(Pi*Major Axis^2)
Growth cone compactness	dimensionless (>=1)	Perimeter2 /√(4 Pi Area). Higher values indicate non-roundness
Number of comets	dimensionless	Number of YFP-EB3 comets, per growth cone
Comet density	1/µm2	Number of YFP-EB3 comets, per growth cone area unit
Median [comet area]	µm2	Median YFP-EB3 comet area, per growth cone
Median [comet major axis]	µm	Median YFP-EB3 comet major axis, per growth cone
Median [comet minor axis]	µm	Median YFP-EB3 comet minor axis, per growth cone
Median [comet eccentricity]	dimensionless (0-1)	Median YFP-EB3 comet eccentricity, per growth cone
Median [instantaneous comet speed]	µm/s	Median YFP-EB3 comet displacement between consecutive time points, per growth cone
Median [comet lifetime]	s	Median YFP-EB3 comet lifetime (from first segmentation to last segmentation), per growth cone
Mean [comet lifetime]	s	Mean YFP-EB3 comet lifetime (from first segmentation to last segmentation), per growth cone
Median [comet angle]	degrees (0-360)	Median angle of YFP-EB3 comet displacement relative to growth cone major axis, per growth cone
Median [comet distance from growth cone midline]	µm	Median distance of YFP-EB3 comets from growth cone midline, per growth cone
Median [comet distance from growth cone frontline]	µm	Median distance of YFP-EB3 comets from growth cone frontline, per growth cone
Total [comet distance from growth cone midline]	µm	Sum of YFP-EB3 comet distance from growth cone middle, per growth cone
Total [comet distance from growth cone frontline]	µm	Sum of YFP-EB3 comet distance from growth cone frontline, per growth cone
IQR [comet area]	µm2	Variability of YFP-EB3 comet area, per growth cone
IQR [comet major axis]	µm	Variability of YFP-EB3 comet length, per growth cone
IQR [comet minor axis]	µm	Variability of YFP-EB3 comet width, per growth cone
IQR [comet eccentricity]	dimensionless (0-1)	Variability of YFP-EB3 comet eccentricity, per growth cone
IQR [comet speed]	µm/s	Variability of YFP-EB3 comet speed, per growth cone
IQR [comet lifetime]	s	Variability of YFP-EB3 comet lifetime, per growth cone
IQR [comet angle]	degrees (0-360)	Variablity of YFP-EB3 comet angle, per growth cone
IQR [comet distance from growth cone midline]	µm	Variability of YFP-EB3 comet distance from growth cone midline, per growth cone
IQR [comet distance from growth cone frontline]	µm	Variability of YFP-EB3 comet distance from growth cone frontline, per growth cone
Growth cone speed	µm/min	Growth cone displacement between consecutive time points
Mean [real comet lifetime]	µm	Average of comet lifetime, excluding comets before and after imaging interval, per growth cone
IQR [real comet lifetime]	µm	Variability of comet lifetime, excluding comets before and after imaging interval, per growth cone
Median [change in comet speed]	µm/s2	Median rate of change in comet speed, per growth cone, t-1 to t
Median [change in distance from growth cone frontline]	µm/Δt	Median rate of change in comet distance from growth cone frontline, per growth cone, t-1 to t
Median [change in distance from growth cone midline]	µm/Δt	Median rate of change in comet distance from growth cone midline, per growth cone, t-1 to t

## Sheet: EB3-comet level
Table S1 cont.
Variable name	Unit	Description
Comet area	µm2	Segmented area of YFP-EB3 comets
Comet major axis	µm	Longest YFP-EB3 comet axis
Comet minor axis	µm	Shortest axis of the YfP-EB3 comet perpendicular to comet major axis
Comet eccentricity	dimensionless (0-1)	Ratio of the distance between fitted ellipse focal points/YFP-EB3 comet major axis length
Comet instantaneous speed	µm/s	YFP-EB3 comet displacement between consecutive time points
Comet lifetime	s	Time elapsed between first and last detection of a particular comet
Comet instantaneous path	µm	YFP-EB3 comet displacement
Total comet path	µm	Total YFP-EB3 comet displacement over comet lifetime
Comet velocity	µm/s	Comet speed with sign depending on anterograde vs retrograde movement
Average comet speed	µm/s	Total comet path/comet lifetime
Comet angle	degrees (0-360)	Angle of YFP-EB3 comet displacement relative to growth cone major axis
Average comet angle	degrees (0-360)	Angle of comet displacement between first and last comet position
Comet distance from growth cone midline	µm	YFP-EB3 comet distance from growth cone midline
Comet distance from growth cone front	µm	YFP-EB3 comet distance from growth cone frontline
Change in comet area	µm2/Δt	rate of change in YFP-EB comet area
Change in comet distance from growth cone front	µm/Δt	rate of change in YFP-EB3 comet distance from growth cone front
Change in comet distance from growth cone midline	µm/Δt	rate of change in YFP-EB3 comet distance from growth cone midline
Change in comet speed	µm/s2	rate of change in YFP-EB3 comet speed
Time elapsed from comet birth	s	number of frames since comet first detected (birth)
Comet relative age	dimensionless (0-1)	Comet current age/comet total age
Time remaining until comet death	s	number of frames until comet is last detected (death)
